# Supplementary material for: Targeting SLC7A11 ameliorates ulcerative colitis by promoting efferocytosis through the ERK1/2 pathway
Source: Research Square preprint supplement (doi:10.21203/rs.3.rs-5966997/v1), 2025-03-27
Supplement: Supplementary file 1 [file 2ad12f2f9435d837154d48e2.docx]

**Targeting SLC7A11 ameliorates ulcerative colitis by promoting efferocytosis through the ERK1/2 pathway**

Meiyi You1, Jichang Li1, Xin Wang1, Yucun Liu1, Shanwen Chen1, Pengyuan Wang1

1, Department of Gastrointestinal Surgery, Peking University First Hospital, Beijing, 100034, People’s Republic of China

Correspondence: Shanwen Chen, Department of Gastrointestinal Surgery, Peking University First Hospital, Beijing, 100034, People’s Republic of China, Email: shanwen@pku.edu.cn; Pengyuan Wang, Department of Gastrointestinal Surgery, Peking University First Hospital, Beijing, 100034, People’s Republic of China, Email: pengyuan_wang@bjmu.ed.cn


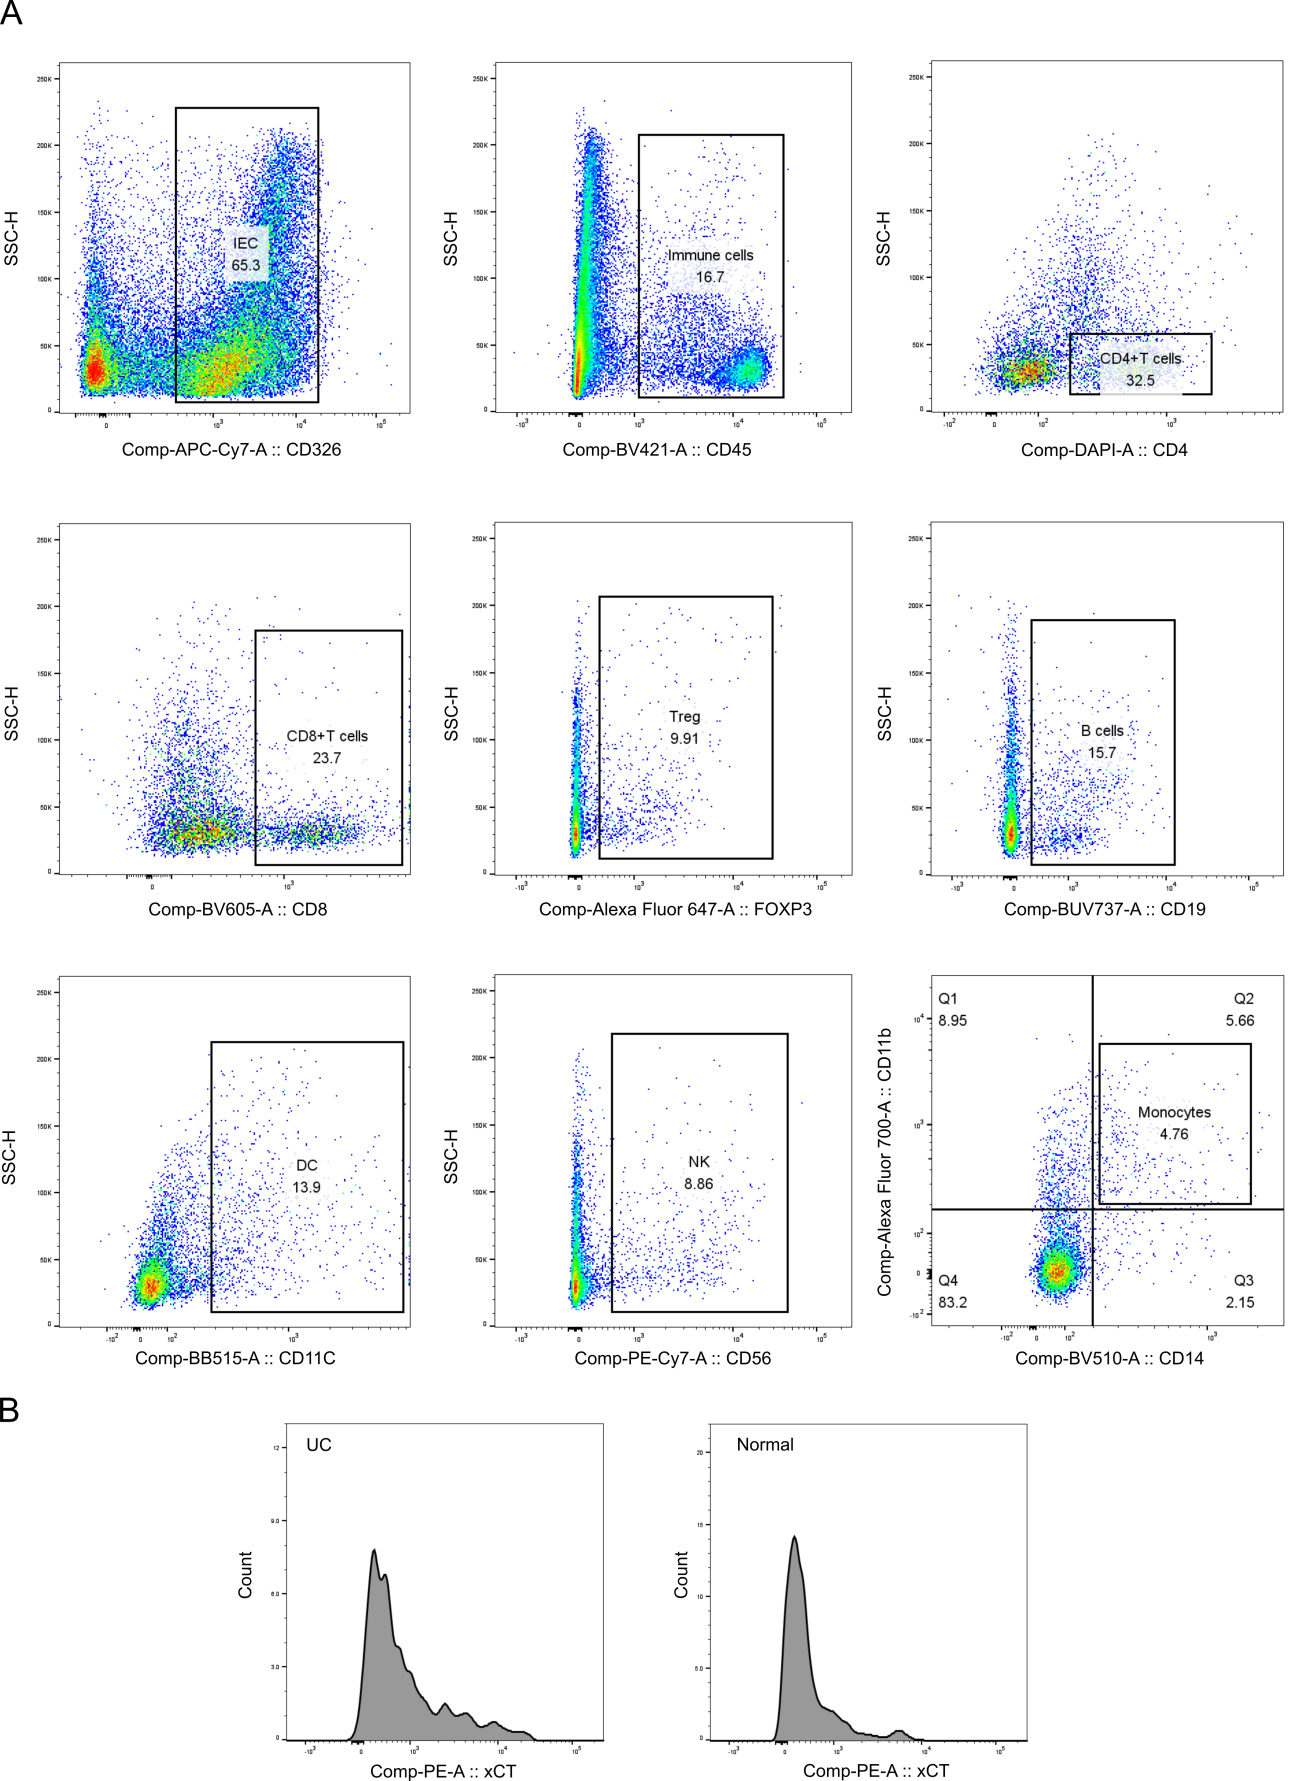


**Fig.S1**

**A** Markers of various cells in flow cytometry. **B** Representative image of SLC7A11 fluorescence intensity of DCs in inflamed colonic epithelial tissue and normal colonic epithelial tissue of UC patients.

**
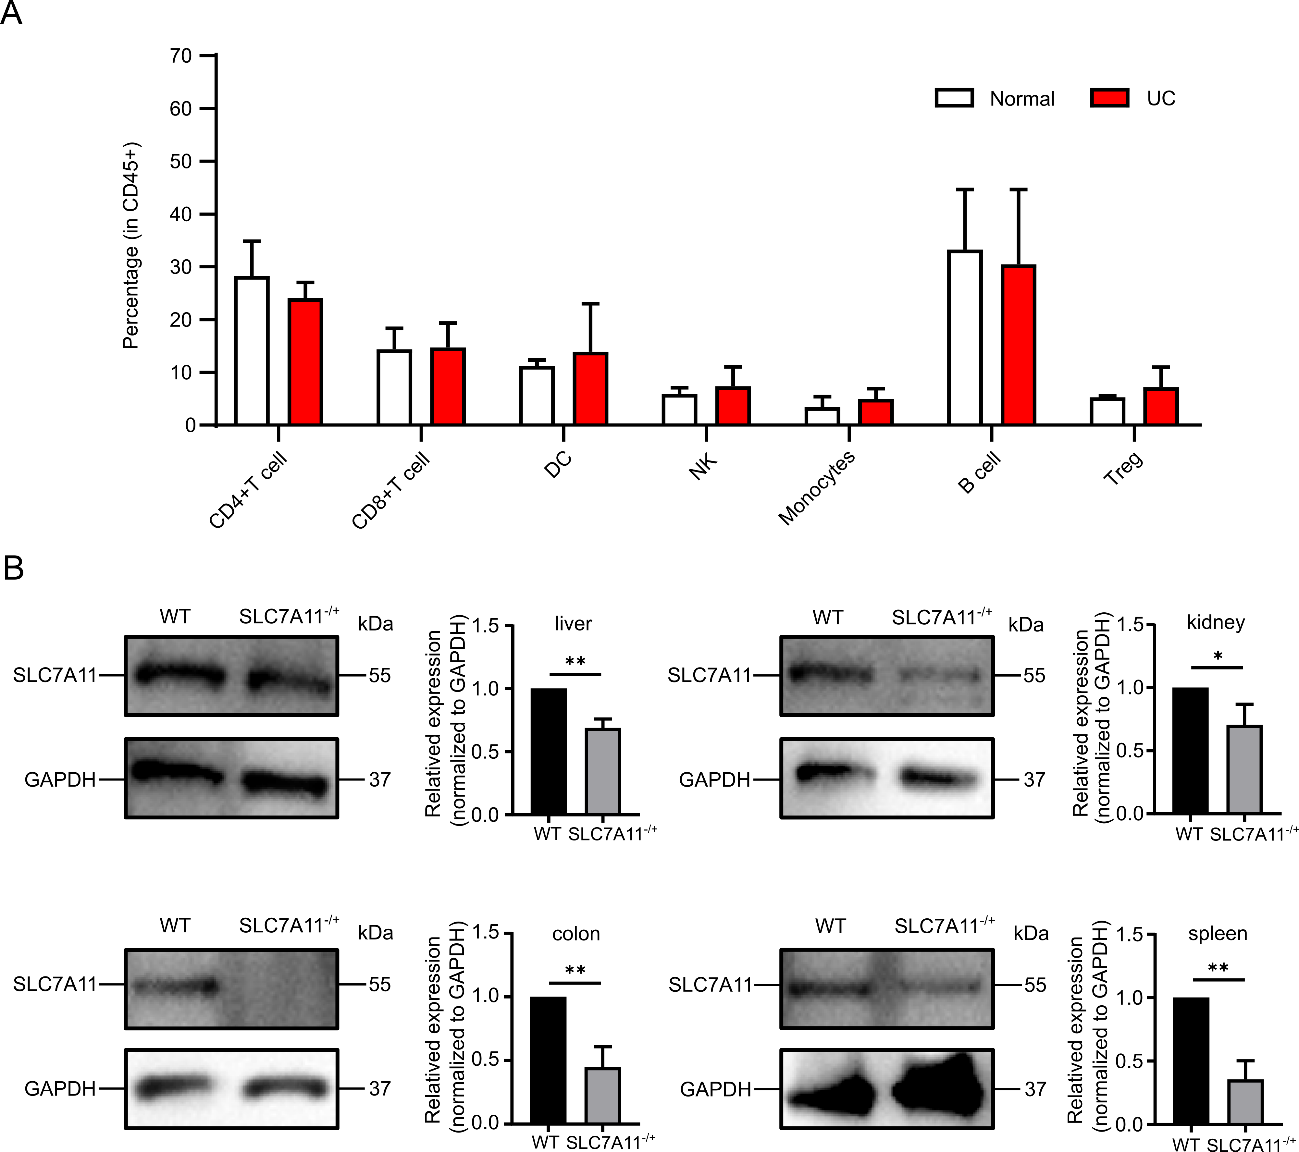
**

**Fig.S2**

**A** Proportion of individual immune cells counted by flow cytometry in inflamed colonic epithelial tissue and normal colonic epithelial tissue of UC patients. **B** Western blotting analysis of SLC7A11 protein expression in different tissues of WT and SLC7A11-/+ mice.
